# Supplementary material for: Candidate gene resequencing to identify rare, pedigree-specific variants influencing healthy aging phenotypes in the long life family study
Source: Springer Nature journal article supplement (doi:10.1186/s12877-016-0253-y), 2016-04-09
Supplement: MOESM1 [file 10026550]

## SUPPLEMENTARY INFORMATION FOR:

### Candidate gene resequencing to identify rare, pedigree-specific variants influencing healthy aging phenotypes in the Long Life Family Study

Todd E. Druley (druley\_t@kids.wustl.edu)<sup>1,2</sup>, Lihua Wang (juwang@dsgmail.wustl.edu)<sup>1,3</sup>, Shiow J. Lin (rosa@dsgmail.wustl.edu)<sup>1,3</sup>, Joseph H. Lee (jhl2@columbia.edu)<sup>4</sup>, Qunyuan Zhang (qunyuan@dsgmail.wustl.edu)<sup>1,3</sup>, E. Warwick Daw (warwick@wustl.edu)<sup>1,3</sup>, Haley J. Abel (habel@dsg.wustl.edu)<sup>1,3</sup>, Sara E. Chasnoff (chasnoff\_s@kids.wustl.edu)<sup>1,2</sup>, Enrique I. Ramos (eiramos@wustl.edu)<sup>1,2</sup>, Benjamin T. Levinson (benjaminlevinson2010@u.northwestern.edu)<sup>1,2</sup>, Bharat Thyagarajan (thya0003@umn.edu)<sup>5</sup>, Anne B. Newman (newmana@edc.pitt.edu)<sup>6</sup>, Kaare Christensen (kchristensen@health.sdu.dk)<sup>7</sup>, Richard Mayeux (rpm2@cumc.columbia.edu)<sup>8</sup>, Michael A. Province (mprovince@wustl.edu)<sup>1,3</sup>

<sup>1</sup> Center for Genome Sciences and Systems Biology, Washington University School of Medicine, USA.

<sup>2</sup> Department of Pediatrics, Washington University School of Medicine, USA.

<sup>3</sup> Division of Statistical Genomics, Department of Genetics, Washington University School of Medicine, USA.

<sup>4</sup> Sergievsky Center, College of Physicians and Surgeons, Columbia University New York, NY, USA ; Taub Institute, College of Physicians and Surgeons, Columbia University New York, NY, USA ; Department of Epidemiology, School of Public Health, Columbia University New York, NY, USA.

<sup>5</sup> Department of Laboratory Medicine and Pathology, University of Minnesota, Minneapolis, MN, USA.

<sup>6</sup> Department of Epidemiology, University of Pittsburgh Graduate School of Public Health Pittsburgh, PA, USA.

<sup>7</sup> The Danish Aging Research Center, Epidemiology, University of Southern Denmark Odense, Denmark.

<sup>8</sup> Gertrude H. Sergievsky Center and the Taub Institute for Research on Alzheimer's Disease and the Aging Brain, Columbia University, New York City, NY, USA.

**Supplementary Table 1. Characteristics (Mean ± standard deviation) of Subjects in LLFS Study by generation. #LLFS proband generation including probands and probands' relatives. \*\*corrected for medication use as published by Wu J *et al.* *Am J Hypertens* 18(7): 935-942. Referenced under *Methods: Subjects*.**

| Phenotypes                               | Proband Generation |             |                  | Offspring Generation |             |                  | Controls   |             |                 |
|------------------------------------------|--------------------|-------------|------------------|----------------------|-------------|------------------|------------|-------------|-----------------|
|                                          | Family (#)         | Subject (#) | Mean ± STD       | Family (#)           | Subject (#) | Mean ± STD       | Family (#) | Subject (#) | Mean ± STD      |
| Age, yrs                                 | 549                | 1240        | 90.26 ± 6.50     | 509                  | 2119        | 60.63 ± 8.21     | 313        | 863         | 65.11 ± 12      |
| HbA1c (%)                                | 513                | 1063        | 5.63 ± 0.36      | 486                  | 1898        | 5.46 ± 0.32      | 289        | 760         | 5.5 ± 0.33      |
| Telomere Length                          | 500                | 1129        | 5160.91 ± 383.90 | 480                  | 1960        | 5412.17 ± 476.81 | 296        | 812         | 5300.51 ± 454.2 |
| Healthy Aging Index                      | 492                | 922         | 5.76 ± 1.76      | 467                  | 1609        | 2.61 ± 1.68      | 272        | 694         | 3.2 ± 1.91      |
| Healthy Aging Index (Mortality Weighted) | 492                | 922         | 5.57 ± 1.88      | 467                  | 1609        | 1.96 ± 1.52      | 272        | 694         | 2.58 ± 1.90     |
| Body Mass Index                          | 537                | 1158        | 26.01 ± 4.20     | 503                  | 2026        | 27.66 ± 5.27     | 310        | 847         | 27.44 ± 4.61    |
| Systolic Blood Pressure**                | 544                | 1215        | 153.01 ± 27.76   | 506                  | 2052        | 134.40 ± 22.86   | 309        | 849         | 140.72 ± 25.13  |
| Diastolic Blood Pressure**               | 544                | 1215        | 83.73 ± 13.37    | 506                  | 2052        | 83.41 ± 12.39    | 309        | 849         | 85.02 ± 12.90   |
| Pulse Pressure**                         | 544                | 1215        | 69.28 ± 21.15    | 506                  | 2052        | 50.99 ± 15.28    | 309        | 849         | 55.70 ± 17.47   |
| Cognitive Function                       | 535                | 1146        | 25.18 ± 4.32     | 495                  | 1788        | 28.91 ± 2.28     | 293        | 765         | 28.5 ± 2.27     |
| HDL Cholesterol (mg/dl)**                | 541                | 1204        | 55.12 ± 16.26    | 498                  | 2034        | 60.09 ± 18.06    | 306        | 839         | 58.53 ± 16.88   |
| LDL Cholesterol (mg/dl)**                | 541                | 1196        | 118.64 ± 35.75   | 498                  | 2013        | 131.94 ± 34.99   | 306        | 830         | 132.73 ± 34.98  |
| Triglyceride (mg/dl)**                   | 541                | 1204        | 118.38 ± 65.70   | 498                  | 2034        | 123.41 ± 84.73   | 306        | 839         | 124.65 ± 83.33  |
| Total Cholesterol (mg/dl)**              | 541                | 1204        | 199.00 ± 43.40   | 498                  | 2034        | 216.79 ± 40.01   | 306        | 839         | 216.5 ± 40.66   |
| Glucose (mg/dl)                          | 543                | 1212        | 95.91 ± 21.55    | 502                  | 2068        | 94.43 ± 20.29    | 306        | 846         | 96.99 ± 20.98   |
| Insulin (mU/L)                           | 542                | 1200        | 8.32 ± 8.76      | 501                  | 2049        | 9.11 ± 7.70      | 303        | 842         | 9.1 ± 6.98      |
| Onset age of Stroke*                     | 549                | 188         | 82 ± 13.15       | 509                  | 54          | 57.68 ± 11.15    | 313        | 44          | 62.86 ± 15.53   |
| Onset age of Heart Disease*              | 549                | 214         | 76.76 ± 12.91    | 509                  | 80          | 57.68 ± 11.15    | 313        | 65          | 63.2 ± 11.86    |
| Onset age of Cancer*                     | 549                | 257         | 74.64 ± 14.62    | 509                  | 191         | 53.47 ± 13.09    | 313        | 90          | 62.04 ± 11.93   |
| Onset age of Chronic Heart Failure*      | 549                | 138         | 86.02 ± 10.86    | 509                  | 21          | 62.67 ± 9.97     | 313        | 17          | 69.53 ± 13.73   |
| Onset age of Diabetes*                   | 543                | 127         | 77.42 ± 12.79    | 503                  | 134         | 55.80 ± 13.85    | 306        | 74          | 61.73 ± 14.13   |
| Onset age of Death*#                     | 498                | 431         | 97.56 ± 3.70     |                      |             |                  |            |             |                 |

**Supplementary Table 2. Characteristics (Mean ± standard deviation) of Subjects in LLFS Study by gender. #LLFS proband generation including probands and probands' relatives. \*\*corrected for medication use as published by Wu J *et al.* *Am J Hypertens* 18(7): 935-942. Referenced under *Methods: Subjects*.**

| Phenotypes                               | Men        |             |                  | Women      |             |                  |
|------------------------------------------|------------|-------------|------------------|------------|-------------|------------------|
|                                          | Family (#) | Subject (#) | Mean ± STD       | Family (#) | Subject (#) | Mean ± STD       |
| Age, yrs                                 | 507        | 1899        | 70.56 ± 15.11    | 527        | 2318        | 70.05 ± 16.09    |
| HbA1c (%)                                | 472        | 1646        | 5.52 ± 0.35      | 511        | 2075        | 5.52 ± 0.33      |
| Telomere Length                          | 474        | 1749        | 5277.32 ± 447.52 | 497        | 2150        | 5347.67 ± 467.36 |
| Healthy Aging Index                      | 465        | 1426        | 3.64 ± 2.22      | 481        | 1791        | 3.64 ± 2.22      |
| Healthy Aging Index (Mortality Weighted) | 465        | 1426        | 3.24 ± 2.31      | 481        | 1791        | 3.03 ± 2.32      |
| Body Mass Index                          | 499        | 1822        | 27.58 ± 4.13     | 518        | 2209        | 26.78 ± 5.43     |
| Systolic Blood Pressure**                | 503        | 1855        | 140.41 ± 23.62   | 522        | 2261        | 141.84 ± 27.99   |
| Diastolic Blood Pressure**               | 503        | 1855        | 85.58 ± 12.53    | 522        | 2261        | 82.41 ± 12.85    |
| Pulse Pressure**                         | 503        | 1855        | 54.84 ± 17.4     | 522        | 2261        | 59.43 ± 20.74    |
| Cognitive Function                       | 492        | 1640        | 27.59 ± 3.25     | 513        | 2059        | 27.73 ± 3.67     |
| HDL Cholesterol (mg/dl)**                | 498        | 1839        | 51.96 ± 15.27    | 520        | 2238        | 63.51 ± 17.38    |
| LDL Cholesterol (mg/dl)**                | 498        | 1811        | 124.78 ± 34.16   | 520        | 2228        | 130.91 ± 36.76   |
| Triglyceride (mg/dl)**                   | 498        | 1839        | 127.48 ± 90.79   | 520        | 2238        | 117.82 ± 68.15   |
| Total Cholesterol (mg/dl)**              | 498        | 1839        | 202.55 ± 39.60   | 520        | 2238        | 218.82 ± 42.40   |
| Glucose (mg/dl)                          | 502        | 1859        | 97.72 ± 21.92    | 522        | 2267        | 93.47 ± 19.69    |
| Insulin (mU/L)                           | 501        | 1845        | 9.15 ± 8.41      | 519        | 2246        | 8.65 ± 7.43      |
| Onset age of Stroke*                     | 506        | 120 (1894)  | 71.25 ± 15.59    | 527        | 166 (2319)  | 75.78 ± 18.71    |
| Onset age of Heart Disease*              | 506        | 215 (1890)  | 68.33 ± 13.11    | 527        | 144 (2318)  | 72.63 ± 16.90    |
| Onset age of Cancer*                     | 506        | 248 (1894)  | 68.67 ± 14.42    | 527        | 290 (2321)  | 61.89 ± 17.88    |
| Onset age of Chronic Heart Failure*      | 506        | 82 (1892)   | 77.59 ± 14.46    | 527        | 94 (2316)   | 85.18 ± 12.45    |
| Onset age of Diabetes*                   | 502        | 180 (1868)  | 65.06 ± 16.00    | 524        | 155 (2279)  | 65.59 ± 17.38    |
| Onset age of Death*#                     | 334        | 224 (425)   | 95.83 ± 3.28     | 292        | 207 (385)   | 99.43 ± 3.19     |

**Supplementary Table 3. Candidate genes sequenced by custom hybridization capture. Referenced under *Methods: Pooled sequencing and indexed custom library preparation.***

|          |          |          |          |           |          |           |          |          |
|----------|----------|----------|----------|-----------|----------|-----------|----------|----------|
| A2M      | C4orf34  | DEFB1    | FOS      | IDH3G     | MDH2     | PAX2      | RAD21    | TAX1BP   |
| ABCA1    | C9orf11  | DGAT1    | FOXA1    | IGF1      | MEF2A    | PAX 3     | RAD51L1  | TBL1XR1  |
| ACADM    | C9orf3   | DGAT2    | FOXA2    | IGF1R     | MEF2C    | PAX 7     | RAD51L3  | TBXAS1   |
| ACADVL   | C9orf94  | DKC1     | FOXA3    | IGF2      | MEF2D    | PCK2      | RAE1     | TEK      |
| ACCN1    | CADPS2   | DKK1     | FOXC1    | IGSF4     | MEOX2    | PCNA      | RRP12    | TERC     |
| ACE      | CALHM1   | DLG7     | FOXC2    | IL10      | METAP1   | PCNXL2    | RUNDC1   | TERF1    |
| ACOT1    | CAMTA1   | DLST     | FOXC1    | IL12A     | MFN2     | PDHB      | RXRA     | TERF2    |
| ACOX1    | CARD14   | DMRT1    | FOXO1    | IL1A      | MINPP1   | PDK4      | S100B    | TERT     |
| ADARB1   | CAT      | DNMT3a   | FOXO3    | IL1B      | MIR181A2 | PEO1      | SDCBP2   | TF       |
| ADARB2   | CD36     | DNMT3b   | FOXO4    | IL6       | MKL1     | PFKFB3    | SDHC     | TFAM     |
| AdipoQ   | CDK6     | DOCK2    | FOXO6    | INS       | MMP10    | PFTK1     | SEMA6A   | THRB     |
| ADRB2    | CDKN2A   | DOCK8    | FST      | INSR      | MMP7     | PGAM1     | SERINC3  | TMEM2    |
| AHR      | CEACAM16 | DPT      | FTO      | IRF6      | MNAT1    | PGAM2     | SH2D4A   | TMTC3    |
| AIF1     | CEBPB    | DRD2     | FUS      | IRS1      | MOCS1    | PGK1      | SH3GLB1  | TNF      |
| AKT1     | CETP     | DSG1     | GAB2     | IRS2      | MSRA     | PGPEP1    | SH3RF2   | TNFRSF11 |
| AKT2     | CGNL1    | DTNBP1   | GATA4    | ITGA1     | MTHFR    | PGR       | SHC1     | TNFSF8   |
| AKT3     | CHRM2    | DYNLL1   | GBA3     | ITSN1     | MTOR     | PHYHIP    | SIRT1    | TOMM40   |
| ALAD     | CHST11   | DYNLL2   | GCLM     | JUN       | MTTP     | PICALM    | SIRT2    | TORC1    |
| AMPK     | CIDEA    | DZIP3    | GH1      | KAT2A     | MYBBP1A  | PIG38     | SIRT3    | TORC2    |
| ANGEL1   | CLK2     | EBF3     | GHR      | KCTD1     | MYC      | PIK3C3    | SIRT4    | TOX      |
| APBB2    | CLPTM1L  | EEF1A1   | GIP      | KIAA0020  | MYF5     | PIK3CB    | SIRT5    | TP53     |
| APOA4    | CLU      | EFEMP1   | GK       | KIAA0174  | MYF6     | PIK3IPI   | SIRT6    | TP63     |
| APOC1    | CLYBL    | EFTUD1   | GPC6     | KIAA1377  | MYO9B    | PITPNM3   | SIRT7    | TRIM25   |
| APOC-3   | CNTN5    | EIF4E3   | GRIN2B   | KIF13B    | MYOD1    | PLAU      | SLC25A21 | TRRAP    |
| APOE     | COMMD4   | EIF5     | GRN      | KL        | MYT1L    | PLEKHA1   | SLC4A4   | TSC22D1  |
| APOE-2   | COMP     | ELAVL1   | GSK3B    | KLRF1     | NAV2     | PLEKHA7   | SLC6A3   | TSHB     |
| ARHGAP1  | COMT     | ELF2     | GSTM1    | LARGE     | NBEA     | PLEKHG3   | SLC6A4   | TSHR     |
| ARNTL    | COQ7     | ELL2     | GSTP1    | LASS3     | NCOR1    | PLK3      | SLC6A7   | TTC6     |
| ATG2B    | CPT1A    | ENO1     | GSTT1    | LBH       | NDUFA11  | PMP2      | SMAD1    | TUBB     |
| ATM      | CPT1B    | EP300    | H2AFX    | LDHB      | NFKB1    | POLG      | SMAD2    | TUSC3    |
| ATP2B4   | CPT2     | EPB41L4B | H6PD     | LDLR      | NFKBIE   | PON1      | SMAD3    | UBE2A    |
| ATP5O    | CR1      | ERCC2    | HADHA    | LEF1      | NFKBIZ   | POT1      | SMAD5    | UBE2G2   |
| ATR      | CREB1    | ERCC8    | HADHB    | LIPC      | NOTCH1   | POU1F1    | SMARCE1  | UBE2H    |
| AVPI1    | CREBBP   | ERGIC1   | HDDC2    | LLGL1     | NPM1     | POU2F1    | SNF1LK   | UCGC     |
| BACE1    | CREBZF   | ESR1     | HELLS    | LMNA      | NR0B1    | POU5F1    | SOCS2    | UCP2     |
| BAT5     | CSF1R    | ESRRA    | HK1      | LMX1B     | NR1D1    | PPARG c1a | SOD1     | ULK1     |
| BCHE     | CSMD3    | ESRRG    | HK2      | LOC285429 | NR1H3    | PPARD     | SOD2     | VASH1    |
| BDNF     | CSNK1G2  | EXOSC6   | HK3      | LOC387763 | NR1H4    | PPARG     | SORCS1   | VPS13D   |
| BHLHE40  | CST3     | FABP1    | HLA-DRB1 | LOC654121 | NR2F1    | PPARGC1A  | SORCS2   | VPS72    |
| BIN1     | CTBP1    | FABP2    | HNF1A    | LOC728734 | NR2F2    | PPARGC1B  | SORL1    | WDR72    |
| BRCA1    | CTBP2    | FABP3    | HNF1B    | LRP1      | NR3C1    | PPP2R2B   | SOX18    | WEE1     |
| BRE      | CTDSP2   | FABP4    | HRAS     | LRP1B     | NR4A2    | PPTC7     | SOX9     | WNT 5B   |
| BTG3     | CTNNA1   | FABP5    | HS3ST3B1 | LRPPRC    | NRF1     | PRDM16    | SREBF1   | WRN      |
| BTNL2    | CTNNA2   | FABP7    | HSF1     | LRRN6C    | NT5DC1   | PREX1     | SREBF2   | WWC1     |
| BUB1B    | CTNNA3   | FAHD1    | HSPA9    | LYST      | OBFC1    | PRNP      | SSPN     | WWOX     |
| BUB3     | CTNND2   | FAS      | HSPB1    | LZTR1     | OGDH     | PROM1     | STAT1    | XDH      |
| C12orf31 | CYP1A1   | FBX032   | HSPC159  | MAFA      | ONECUT1  | PROP1     | STUB1    | XKR6     |
| C12orf72 | CYP3A5   | FGFR1    | hTERC    | MAFF      | OR56A1   | PROX1     | SUMF1    | XRCC5    |
| C1orf151 | DAB2     | FHIT     | hTERT    | MAPK8     | PAK1     | PTEN      | SYNE1    | ZAK      |
| C2       | DCPS     | FLJ20272 | HTT      | MAPK9     | PAPD5    | PTK2      | SYT13    | ZBTB20   |
| C20orf79 | DDB1     | FLJ31951 | IDE      | MAPT      | PAPPA2   | PYGO2     | TADA2A   | ZNF562   |
| C21orf57 | DDIT3    | FLJ33708 | IDH3A    | MB        | PARK2    | RAB9A     | TAPBPL   | ZWINT    |

# Supplementary Figure 1. Q-Q Plots

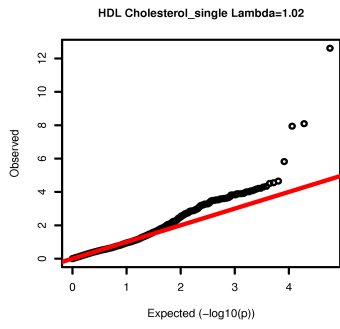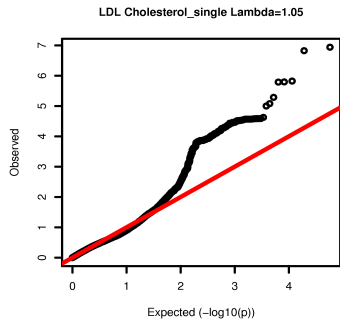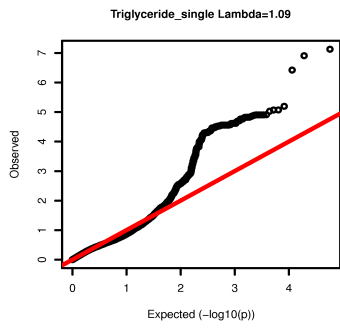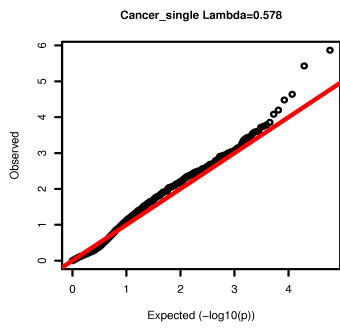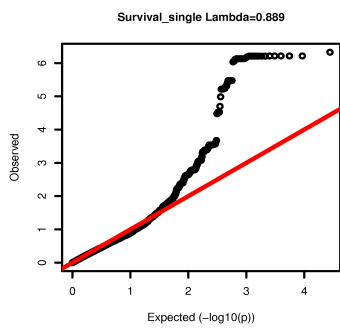

**Supplementary Table 4. The distribution of variants within families in the sequence data.** Referenced under *Results: Sample characteristics: Sequencing results.*

| <b>Category</b>                  | <b>Count</b> | <b>Percent</b> |
|----------------------------------|--------------|----------------|
| Singletons                       | 12,303       | 40.86          |
| Variants in 1 Family             | 17,995       | 59.76          |
| Variants in 2 Families           | 2,997        | 9.95           |
| Variants in 3 Families           | 1,264        | 4.20           |
| Variants in 4 Families           | 803          | 2.67           |
| Variants in 5 Families           | 477          | 1.58           |
| Variants in 6 Families           | 397          | 1.32           |
| Variants in 7 Families           | 292          | 0.97           |
| Variants in 8 Families           | 236          | 0.78           |
| Variants in 9 Families           | 211          | 0.70           |
| Variant in more than 10 Families | 5,440        | 18.07          |

**Supplementary Table 5. The distribution of allele frequency in the sequence data.** Referenced under *Results: Sample characteristics: Sequencing results.*

| <b>MAF (%)</b> | <b>Count (Percent): Longevity Family</b> | <b>Count (Percent): Control Group</b> |
|----------------|------------------------------------------|---------------------------------------|
| 0 - 0.5        | 26035 (86.46)                            | 26021 (86.41)                         |
| >0.5 – 1.0     | 696 (2.31)                               | 706 (2.34)                            |
| >1.0 – 5.0     | 1268 (4.21)                              | 1290 (4.28)                           |
| >5.0 – 10.0    | 481 (1.60)                               | 472 (1.57)                            |
| >10.0 – 30.0   | 999 (3.32)                               | 999 (3.32)                            |
| >30.0 – 50.0   | 633 (2.10)                               | 624 (2.07)                            |
| Total          | 30112 (100)                              | 30112 (100)                           |

**Supplementary Table 6. Pedigrees and individuals with the novel *OBFC1*.** Only two individuals – brothers – with this variant are deceased (2413 and 2418). Referenced under *Results: Sample characteristics: Single variant analyses*.

| PEDID       | fuscore_adj1 | subject | AGE       | GENDER | DADsubj | MOMsubj |
|-------------|--------------|---------|-----------|--------|---------|---------|
| 25609942    | 2.08325539   | 2413    | 97        | male   | 2423    | 2424    |
| 25609942    | 5.07095304   | 2418    | 110       | male   | 2423    | 2424    |
| 25609942    | NA           | 2406    | 57        | male   | 2413    | 2420    |
| 25609942    | NA           | 2412    | 65        | male   | 2417    | 2428    |
| 30706733    | NA           | 8049    | 62        | female | 8047    | 8054    |
| 30706733    | NA           | 8050    | 61        | male   | 8046    | 8048    |
| 30706733    | NA           | 8054    | 89        | female | 8044    | 8045    |
| 25826322    | NA           | 11291   | 75        | female | 0       | 0       |
| 25826322    | NA           | 11293   | 51        | female | 11283   | 11291   |
| 25562597    | NA           | 11103   | 61        | male   | 10081   | 11101   |
| 25562597    | NA           | 30289   | 72        | male   | 10081   | 11101   |
| 2162        | NA           | 12783   | 72        | female | 0       | 0       |
| 21658323    | NA           | 30673   | 58        | female | 30666   | 30672   |
| 6 pedigrees |              |         | 13 people |        |         |         |



**Supplementary Fig 1. Boxplots of associated traits vs candidate genotypes.** Referenced under *Results: Sample characteristics: Single variant analyses.*

**X axis 0: variant/variant genotype**

**X axis 1: ref/variant genotype**

**X axis 2: ref/ref genotype**

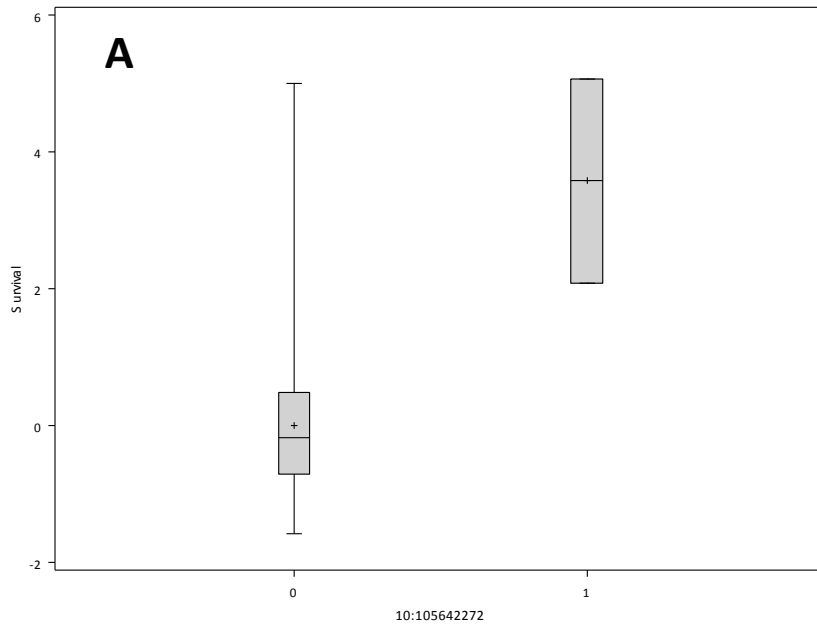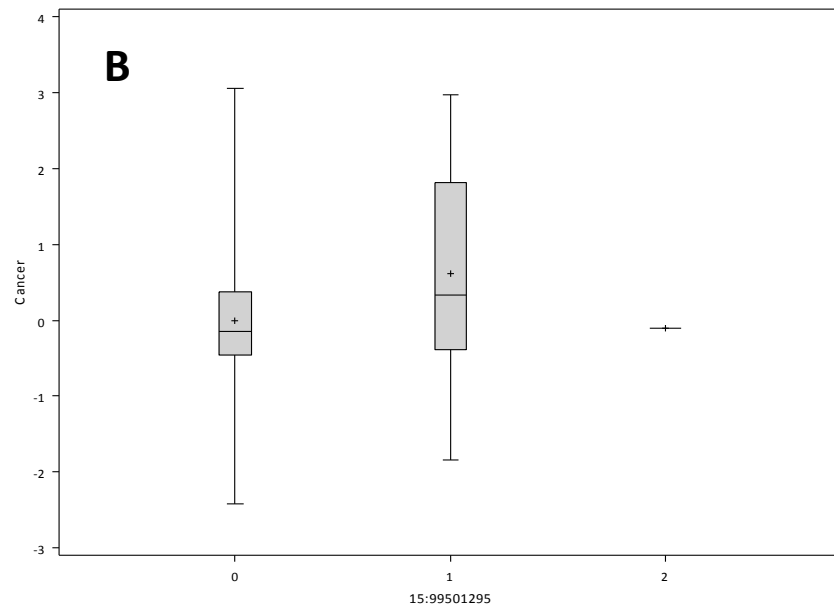

Supplementary Fig 1. Boxplots of traits vs candidate dosage of ref allele (Continued)

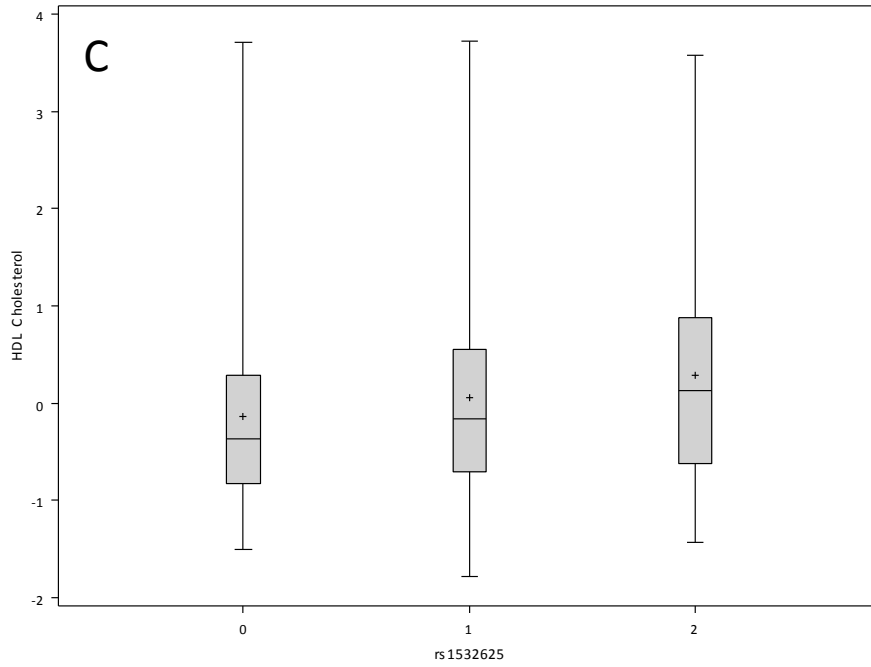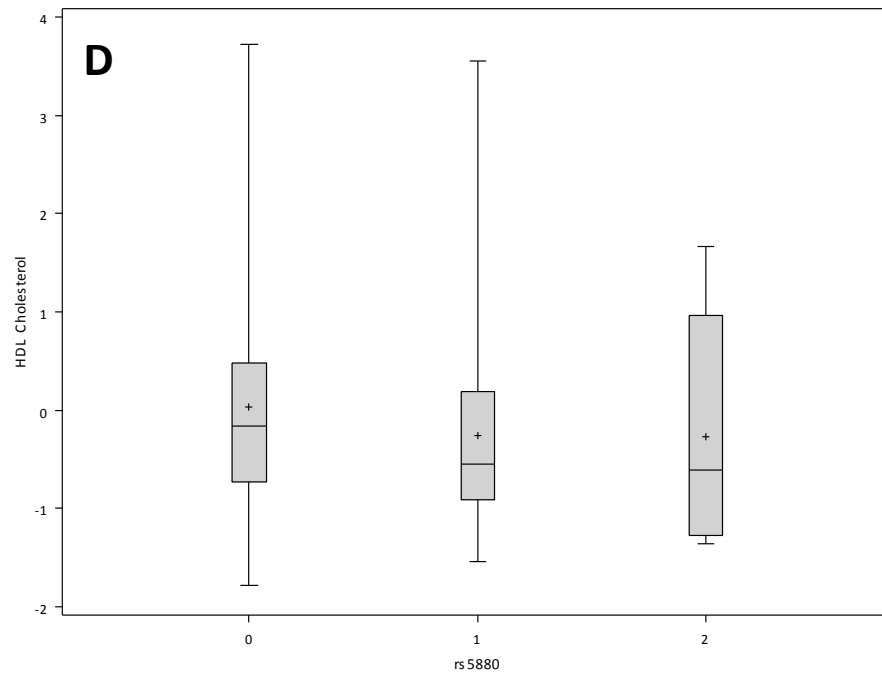

Supplementary Fig 1. Boxplots of traits vs candidate dosage of ref allele (Continued)

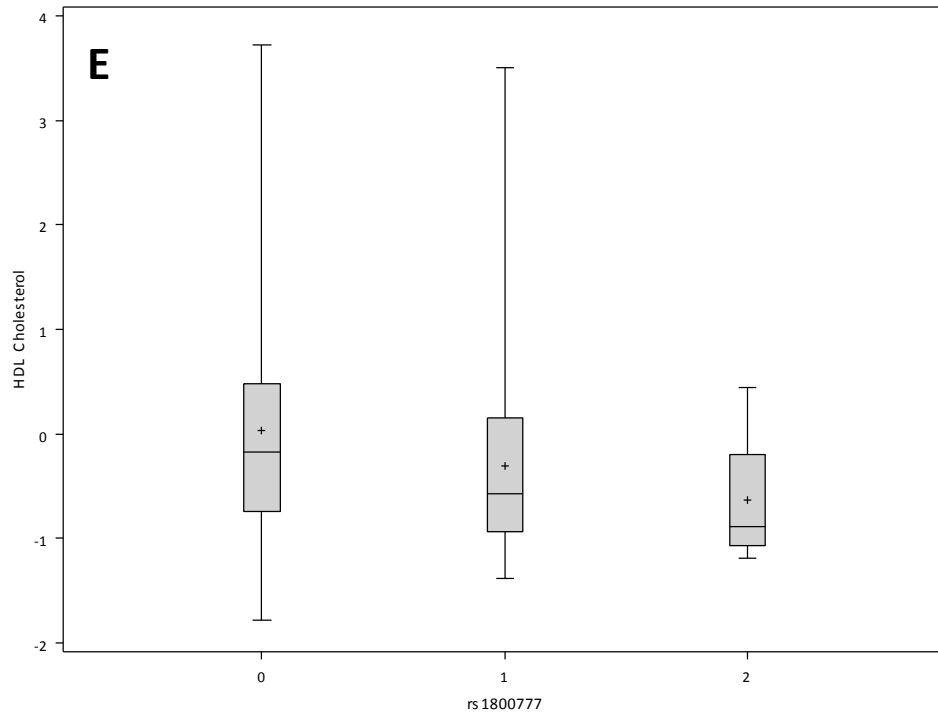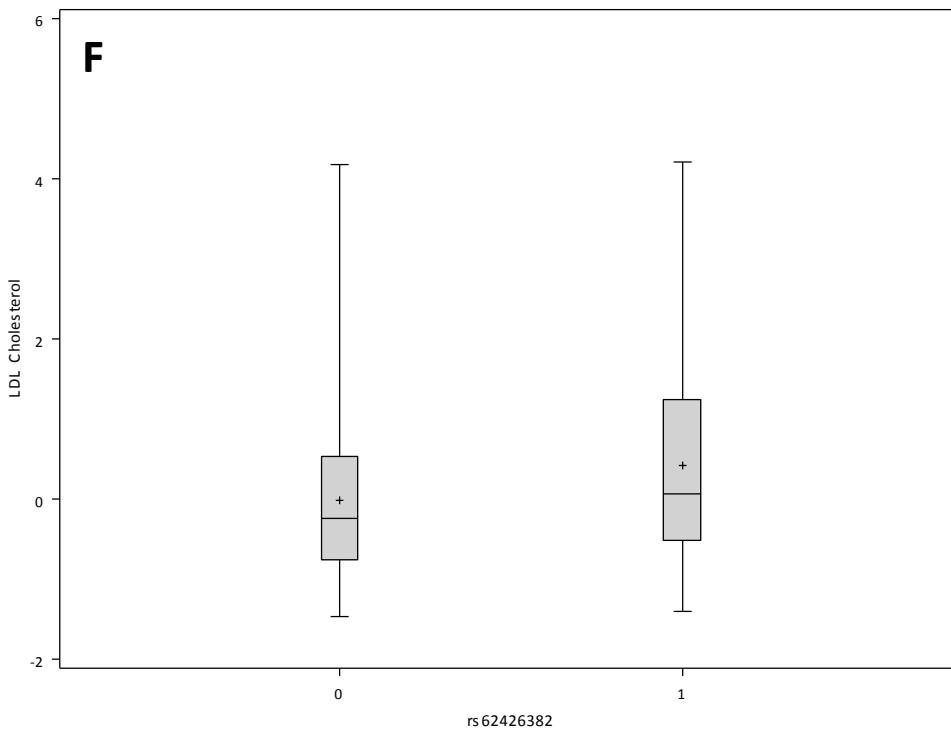

Supplementary Fig 1. Boxplots of traits vs candidate dosage of ref allele (Continued)

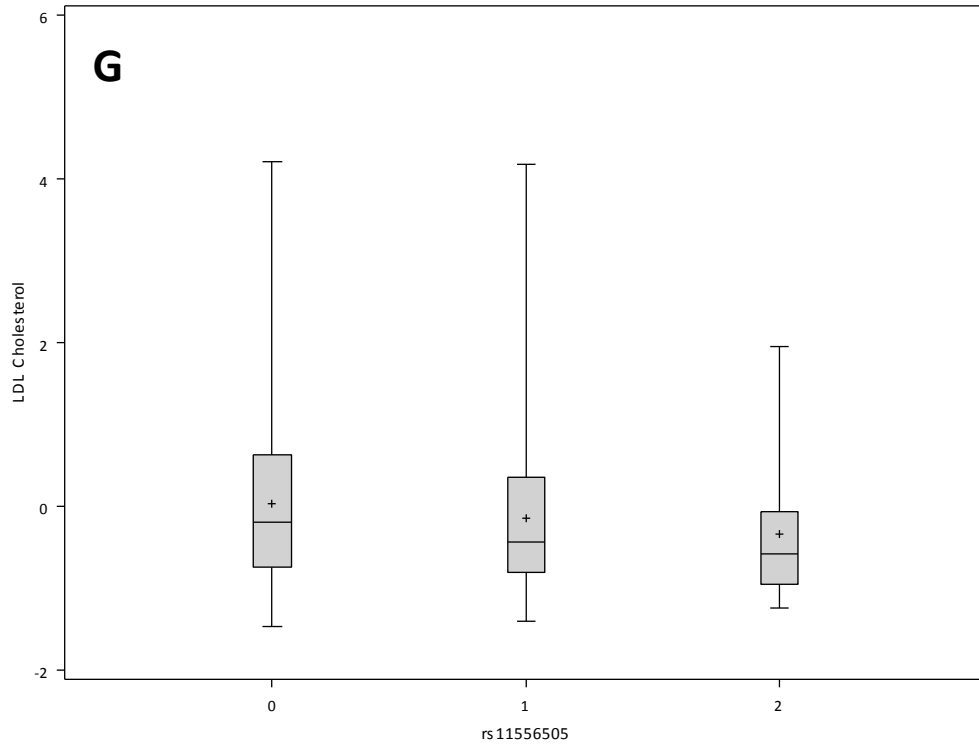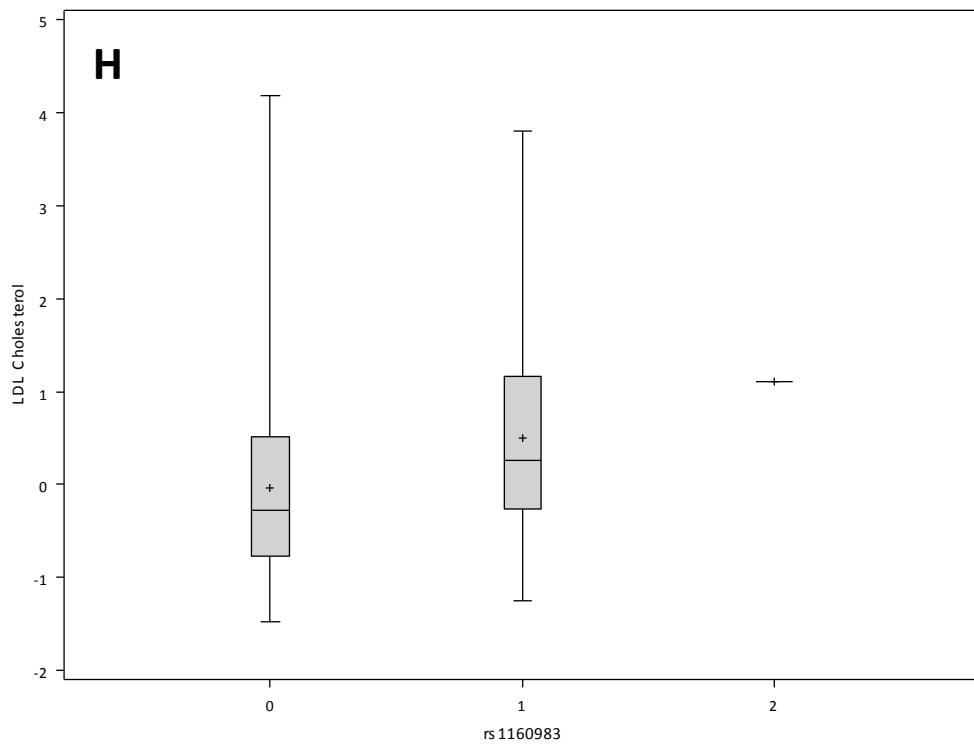

Supplementary Figure 1. Boxplots of traits vs candidate dosage of ref allele (Continued)

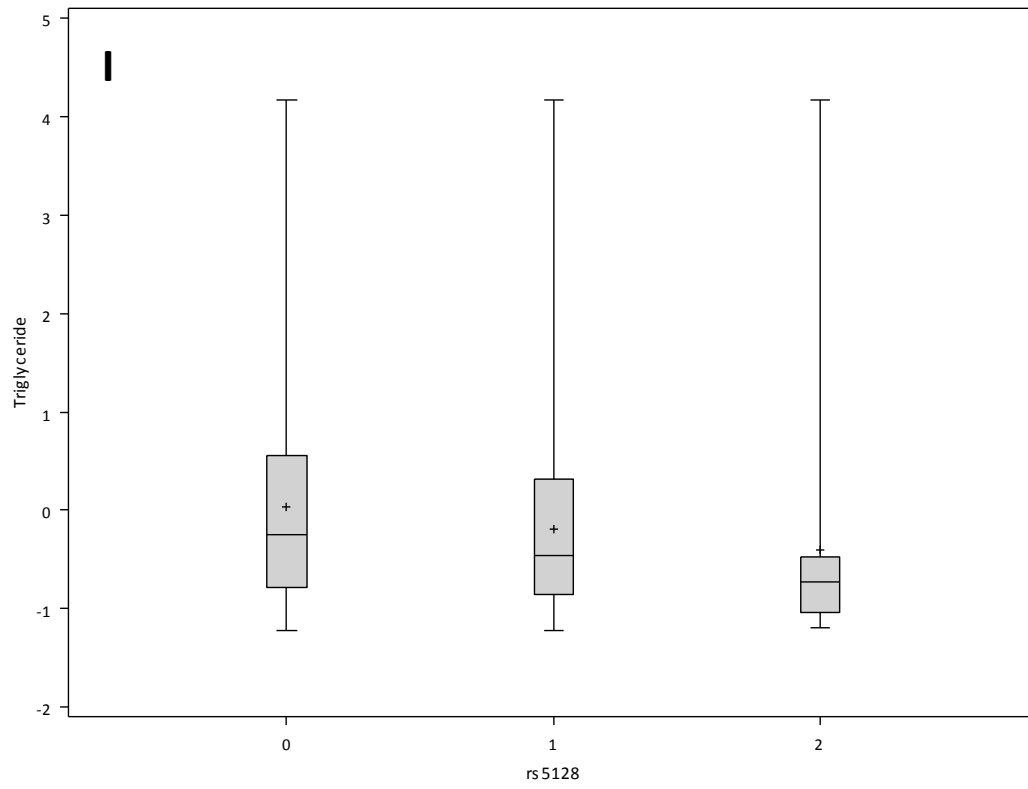

**Supplementary Table 7. Published single variants for healthy aging-related genes.** A listing of single variants found to have a P-value <0.05 and more than 10 allele copies for “Survival Trait Exceptionality Score” in the Long Life Family Study sequencing. These results validate existing reports finding the same variants to be associated with healthy aging. Those reports can be found by referencing the PubMed ID in the far right column. Referenced under *Results: Sample characteristics: Single variant analyses*.

| Phenotype: Survival trait exceptionality score |               |             |          |            |                 |         |            |                          |                              |        |           |          |           |
|------------------------------------------------|---------------|-------------|----------|------------|-----------------|---------|------------|--------------------------|------------------------------|--------|-----------|----------|-----------|
| chr                                            | base position | rsID        | gene     | Function   | Exonic Function | Variant | Ref allele | Variant allele frequency | Number of individuals tested | Beta   | Std Error | P value  | Pubmed ID |
| 1                                              | 7827441       | rs35705966  | CAMTA1   | UTR3       |                 | A       | T          | 0.236                    | 809                          | -0.162 | 0.058     | 5.70E-03 | 22279548  |
| 1                                              | 12304694      | rs79820334  | VPS13D   | intronic   |                 | G       | A          | 0.025                    | 806                          | 0.353  | 0.17      | 3.83E-02 | 22279548  |
| 2                                              | 31596731      | rs17395224  | XDH      | intronic   |                 | A       | G          | 0.027                    | 794                          | -0.326 | 0.156     | 3.70E-02 | 22279548  |
| 2                                              | 141773397     | rs78806080  | LRP1B    | exonic     | synonymous      | A       | C          | 0.067                    | 808                          | 0.231  | 0.097     | 1.79E-02 | 19367585  |
| 2                                              | 141806541     | rs142051427 | LRP1B    | intronic   |                 | T       | A          | 0.011                    | 810                          | 0.698  | 0.221     | 1.61E-03 | 19367585  |
| 2                                              | 216990772     | rs28371549  | XRCC5    | intronic   |                 | G       | A          | 0.042                    | 798                          | -0.314 | 0.13      | 1.56E-02 | 22406557  |
| 2                                              | 217070248     | rs1051677   | XRCC5    | UTR3       |                 | C       | T          | 0.118                    | 809                          | -0.226 | 0.081     | 5.64E-03 | 22406557  |
| 2                                              | 217070652     | rs6941      | XRCC5    | UTR3       |                 | A       | C          | 0.117                    | 809                          | -0.226 | 0.081     | 5.64E-03 | 22406557  |
| 3                                              | 176742501     | rs201627324 | TBL1XR1  | UTR3       |                 | A       | G          | 0.015                    | 691                          | 0.484  | 0.215     | 2.47E-02 | 22279548  |
| 5                                              | 11082863      | rs114692065 | CTNND2   | exonic     | synonymous      | T       | C          | 0.005                    | 801                          | 0.644  | 0.259     | 1.30E-02 | 22279548  |
| 5                                              | 52157374      | rs2447867   | ITGA1    | exonic     | synonymous      | T       | C          | 0.18                     | 803                          | -0.167 | 0.067     | 1.33E-02 | 22279548  |
| 5                                              | 115833090     | rs148664380 | SEMA6A   | intronic   |                 | A       | G          | 0.009                    | 740                          | -0.679 | 0.315     | 3.13E-02 | 22279548  |
| 5                                              | 172378857     | rs539936    | ERGIC1   | UTR3       |                 | C       | T          | 0.046                    | 808                          | 0.32   | 0.118     | 6.75E-03 | 22279548  |
| 6                                              | 32370860      | rs75415018  | BTNL2    | exonic     | synonymous      | A       | G          | 0.01                     | 810                          | -0.514 | 0.26      | 4.78E-02 | 22279548  |
| 6                                              | 109002042     | rs4945816   | FOXO3    | UTR3       |                 | C       | T          | 0.302                    | 801                          | 0.117  | 0.057     | 4.04E-02 | 18765803  |
| 6                                              | 109003321     | rs4946936   | FOXO3    | UTR3       |                 | T       | C          | 0.3                      | 804                          | 0.134  | 0.057     | 1.96E-02 | 18765803  |
| 6                                              | 109003989     | rs9400241   | FOXO3    | UTR3       |                 | C       | A          | 0.299                    | 790                          | 0.129  | 0.058     | 2.79E-02 | 18765803  |
| 6                                              | 109005588     | rs111727905 | FOXO3    | UTR3       |                 | G       | A          | 0.311                    | 807                          | 0.118  | 0.056     | 3.56E-02 | 18765803  |
| 6                                              | 152423128     | rs9341077   | ESR1     | UTR3       |                 | C       | T          | 0.038                    | 809                          | -0.282 | 0.136     | 3.87E-02 | 20819792  |
| 6                                              | 152466674     | rs2747662   | SYNE1    | exonic     | synonymous      | C       | T          | 0.324                    | 808                          | -0.166 | 0.053     | 1.72E-03 | 22279548  |
| 6                                              | 152469188     | rs2252755   | SYNE1    | exonic     | nonsynonymous   | G       | C          | 0.321                    | 794                          | -0.142 | 0.054     | 9.57E-03 | 22279548  |
| 6                                              | 152469331     | rs2252748   | SYNE1    | exonic     | synonymous      | T       | C          | 0.274                    | 774                          | -0.151 | 0.057     | 8.73E-03 | 22279548  |
| 6                                              | 152640110     | rs2306914   | SYNE1    | exonic     | nonsynonymous   | A       | G          | 0.023                    | 809                          | -0.442 | 0.172     | 1.02E-02 | 22279548  |
| 6                                              | 152646279     | rs9383987   | SYNE1    | exonic     | synonymous      | C       | G          | 0.025                    | 806                          | -0.337 | 0.168     | 4.51E-02 | 22279548  |
| 6                                              | 152784621     | rs9397509   | SYNE1    | exonic     | nonsynonymous   | C       | T          | 0.007                    | 809                          | 0.584  | 0.251     | 2.04E-02 | 22279548  |
| 7                                              | 90675195      | rs3779581   | CDK14    | intronic   |                 | T       | C          | 0.158                    | 808                          | 0.168  | 0.068     | 1.39E-02 | 22279548  |
| 7                                              | 90747371      | rs3735649   | CDK14    | intronic   |                 | C       | T          | 0.037                    | 805                          | 0.299  | 0.145     | 3.91E-02 | 22279548  |
| 7                                              | 90838617      | rs12534311  | CDK14    | UTR3       |                 | A       | G          | 0.064                    | 809                          | 0.346  | 0.101     | 6.43E-04 | 22279548  |
| 7                                              | 90838869      | rs3814098   | CDK14    | UTR3       |                 | G       | C          | 0.118                    | 806                          | 0.188  | 0.079     | 1.74E-02 | 22279548  |
| 7                                              | 92234222      | rs200127512 | CDK6     | downstream |                 | A       | G          | 0.461                    | 650                          | 0.259  | 0.118     | 2.89E-02 | 22279548  |
| 7                                              | 92241262      | rs74980371  | CDK6     | UTR3       |                 | T       | C          | 0.042                    | 810                          | -0.267 | 0.132     | 4.35E-02 | 22279548  |
| 7                                              | 94946084      | rs854560    | PON1     | exonic     | nonsynonymous   | T       | A          | 0.361                    | 770                          | 0.154  | 0.056     | 6.17E-03 | 12082503  |
| 7                                              | 124481185     | rs35536751  | POT1     | exonic     | nonsynonymous   | A       | C          | 0.019                    | 810                          | 0.493  | 0.198     | 1.31E-02 | 22113349  |
| 7                                              | 139715641     | rs8192868   | TBXAS1   | exonic     | nonsynonymous   | A       | G          | 0.019                    | 810                          | 0.528  | 0.251     | 3.60E-02 | 22279548  |
| 8                                              | 28927901      | rs148967534 | KIF13B   | UTR3       |                 | T       | A          | 0.015                    | 541                          | -0.611 | 0.284     | 3.20E-02 | 22279548  |
| 8                                              | 28950309      | rs17526980  | KIF13B   | exonic     | nonsynonymous   | T       | C          | 0.02                     | 789                          | 0.512  | 0.218     | 1.89E-02 | 22279548  |
| 8                                              | 113241088     | rs1592624   | CSMD3    | exonic     | nonsynonymous   | T       | G          | 0.453                    | 504                          | 0.118  | 0.059     | 4.80E-02 | 22279548  |
| 9                                              | 74319576      | rs25696     | TMEM2    | exonic     | synonymous      | T       | A          | 0.027                    | 808                          | 0.326  | 0.154     | 3.46E-02 | 22279548  |
| 9                                              | 74319677      | rs17057133  | TMEM2    | exonic     | nonsynonymous   | C       | T          | 0.024                    | 808                          | 0.446  | 0.162     | 5.92E-03 | 22279548  |
| 9                                              | 74360209      | rs373799377 | TMEM2    | exonic     | synonymous      | C       | G          | 0.133                    | 809                          | 0.169  | 0.077     | 2.86E-02 | 22279548  |
| 9                                              | 74360209      | rs3739783   | TMEM2    | exonic     | synonymous      | C       | G          | 0.133                    | 809                          | 0.169  | 0.077     | 2.86E-02 | 22279548  |
| 9                                              | 129459181     | rs71497630  | LMX1B    | UTR3       |                 | T       | C          | 0.06                     | 612                          | -0.27  | 0.11      | 1.43E-02 | 22279548  |
| 10                                             | 1228575       | rs76022202  | ADARB2   | UTR3       |                 | A       | G          | 0.013                    | 809                          | -0.608 | 0.238     | 1.09E-02 | 20011587  |
| 10                                             | 67726514      | rs2105702   | CTNNA3   | intronic   |                 | C       | A          | 0.292                    | 810                          | 0.114  | 0.054     | 3.73E-02 | 22279548  |
| 10                                             | 68040240      | rs10997034  | CTNNA3   | exonic     | synonymous      | T       | G          | 0.029                    | 810                          | 0.271  | 0.132     | 4.13E-02 | 22279548  |
| 10                                             | 131633911     | rs74562419  | EBF3     | UTR3       |                 | A       | G          | 0.011                    | 810                          | 0.558  | 0.259     | 3.14E-02 | 22279548  |
| 11                                             | 216290        | rs10714     | SIRT3    | UTR3       |                 | A       | G          | 0.033                    | 810                          | 0.323  | 0.136     | 1.80E-02 | 14580859  |
| 11                                             | 16809573      | rs1557875   | PLEKHA7  | UTR3       |                 | A       | G          | 0.169                    | 808                          | 0.154  | 0.068     | 2.31E-02 | 22279548  |
| 11                                             | 115045674     | rs117706029 | CADM1    | UTR3       |                 | A       | G          | 0.009                    | 810                          | -0.694 | 0.327     | 3.43E-02 | 22279548  |
| 11                                             | 116703640     | rs5128      | APOC3    | UTR3       |                 | G       | C          | 0.093                    | 797                          | -0.204 | 0.089     | 2.21E-02 | 8018664   |
| 12                                             | 121439598     | rs11065390  | HNF1A    | UTR3       |                 | A       | G          | 0.015                    | 798                          | -0.551 | 0.232     | 1.77E-02 | 20834067  |
| 12                                             | 132406666     | rs7138581   | ULK1     | UTR3       |                 | C       | G          | 0.107                    | 800                          | -0.17  | 0.08      | 3.44E-02 | 23061800  |
| 13                                             | 43787647      | rs1037022   | ENOX1    | downstream |                 | C       | T          | 0.364                    | 771                          | 0.164  | 0.054     | 2.64E-03 | 22279548  |
| 13                                             | 43788036      | rs703206    | ENOX1    | UTR3       |                 | G       | T          | 0.388                    | 807                          | 0.103  | 0.052     | 5.00E-02 | 22279548  |
| 13                                             | 95058076      | rs113980048 | GPC6     | UTR3       |                 | A       | C          | 0.021                    | 810                          | 0.419  | 0.197     | 3.40E-02 | 22279548  |
| 13                                             | 100425074     | rs74694961  | CLYBL    | intronic   |                 | T       | G          | 0.012                    | 810                          | 0.656  | 0.233     | 4.93E-03 | 22279548  |
| 13                                             | 110407815     | rs2289047   | IRS2     | UTR3       |                 | A       | C          | 0.318                    | 806                          | -0.118 | 0.055     | 3.07E-02 | 19887537  |
| 13                                             | 110408312     | rs139324222 | IRS2     | UTR3       |                 | T       | G          | 0.027                    | 810                          | 0.492  | 0.175     | 5.00E-03 | 19887537  |
| 14                                             | 37203697      | rs10135196  | SLC25A21 | intronic   |                 | A       | G          | 0.232                    | 809                          | 0.124  | 0.062     | 4.71E-02 | 22279548  |
| 14                                             | 77254836      | rs2242624   | ANGEL1   | UTR3       |                 | A       | C          | 0.291                    | 810                          | 0.121  | 0.056     | 3.23E-02 | 22279548  |
| 14                                             | 81422178      | rs2234919   | TSHR     | exonic     | nonsynonymous   | A       | C          | 0.043                    | 666                          | 0.254  | 0.112     | 2.40E-02 | 19837933  |
| 15                                             | 99500605      | rs17847203  | IGF1R    | exonic     | synonymous      | T       | C          | 0.032                    | 789                          | -0.373 | 0.149     | 1.25E-02 | 12843179  |
| 15                                             | 99501545      | rs34875596  | IGF1R    | UTR3       |                 | T       | C          | 0.027                    | 759                          | -0.453 | 0.155     | 3.54E-03 | 12843179  |
| 15                                             | 99502527      | rs1058696   | IGF1R    | UTR3       |                 | T       | C          | 0.028                    | 773                          | -0.362 | 0.155     | 1.93E-02 | 12843179  |
| 15                                             | 99503836      | rs9282715   | IGF1R    | UTR3       |                 | C       | T          | 0.053                    | 723                          | -0.348 | 0.107     | 1.14E-03 | 12843179  |
| 15                                             | 99504004      | rs61736167  | IGF1R    | UTR3       |                 | A       | G          | 0.036                    | 808                          | -0.365 | 0.128     | 4.35E-03 | 12843179  |
| 16                                             | 50251590      | rs3887556   | PAPD5    | intronic   |                 | G       | A          | 0.311                    | 798                          | -0.123 | 0.055     | 2.61E-02 | 22279548  |
| 16                                             | 50265818      | rs4611456   | PAPD5    | UTR3       |                 | C       | T          | 0.226                    | 807                          | -0.123 | 0.058     | 3.44E-02 | 22279548  |
| 16                                             | 50265862      | rs4374170   | PAPD5    | UTR3       |                 | G       | T          | 0.227                    | 805                          | -0.124 | 0.059     | 3.47E-02 | 22279548  |
| 16                                             | 57007353      | rs5883      | CETP     | exonic     | synonymous      | T       | C          | 0.069                    | 808                          | 0.207  | 0.098     | 3.41E-02 | 14559957  |
| 17                                             | 33445549      | rs9901455   | RAD51D   | exonic     | synonymous      | A       | G          | 0.098                    | 809                          | 0.253  | 0.082     | 2.16E-03 | 22279548  |
| 17                                             | 78166385      | rs11658460  | CARD14   | exonic     | synonymous      | T       | C          | 0.061                    | 668                          | -0.28  | 0.124     | 2.40E-02 | 22279548  |
| 19                                             | 7114247       | rs139376149 | INSR     | UTR3       |                 | T       | C          | 0.004                    | 810                          | 0.666  | 0.328     | 4.28E-02 | 15582274  |
| 19                                             | 7166388       | rs2229429   | INSR     | exonic     | synonymous      | A       | G          | 0.194                    | 810                          | 0.163  | 0.064     | 1.14E-02 | 15582274  |
| 19                                             | 18475285      | rs4808787   | PGPEP1   | UTR3       |                 | G       | A          | 0.34                     | 678                          | -0.141 | 0.057     | 1.40E-02 | 22279548  |
| 19                                             | 45396144      | rs11556505  | TOMM40   | exonic     | synonymous      | T       | C          | 0.101                    | 808                          | -0.2   | 0.097     | 4.07E-02 | 21418511  |

**Supplementary Table 8. Published genes associated with healthy aging and found to suggestive by burden testing in 810 LLFS participants.** A listing of genes found to have a P-value <0.05 by at least one of four burden-testing algorithms. Published reports can be found by referencing the PubMed ID in the far right column. Referenced under *Results: Sample characteristics: Analysis of multiple variants across genes.*

| Gene   | RefSeq       | Gene Exon N | Exons Adequately Covered by Sequencing | Variants Called N | Ped N | P-value (UWSS) | P-value (WSS) | P-value (PWST) | P-value (Skat) | PUBMED ID |
|--------|--------------|-------------|----------------------------------------|-------------------|-------|----------------|---------------|----------------|----------------|-----------|
| ACE    | NM_000789    | 25          | 15                                     | 23                | 47    | 4.51E-01       | 9.00E-01      | 4.20E-02       | 5.27E-02       | 8136829   |
| CETP   | NM_000078    | 16          | 7                                      | 10                | 15    | 2.61E-02       | 1.87E-02      | 2.50E-01       | 2.79E-01       | 14559957  |
| CSMD3  | NM_198123    | 71          | 36                                     | 67                | 118   | 6.68E-01       | 4.53E-01      | 2.90E-01       | 3.20E-02       | 22279548  |
| DEFB1  | NM_005218    | 2           | 2                                      | 13                | 24    | 7.92E-02       | 4.19E-02      | 6.50E-02       | 2.43E-02       | 22279548  |
| DOCK2  | NM_004946    | 52          | 17                                     | 29                | 36    | 1.19E-01       | 1.70E-01      | 6.70E-02       | 9.20E-03       | 22279548  |
| FOXO1  | NM_002015    | 3           | 2                                      | 36                | 70    | 2.45E-01       | 6.26E-01      | 8.80E-02       | 2.71E-02       | 19793722  |
| GATA4  | NM_002052    | 7           | 4                                      | 34                | 61    | 5.85E-02       | 9.08E-02      | 4.20E-02       | 1.48E-02       | 22279548  |
| LINGO2 | NM_152570    | 7           | 3                                      | 15                | 24    | 2.17E-02       | 1.87E-02      | 8.70E-01       | 8.28E-01       | 22279548  |
| LMNA   | NM_001282625 | 13          | 1                                      | 6                 | 10    | 8.66E-01       | 8.95E-01      | 1.30E-01       | 3.08E-02       | 22279548  |
| LMX1B  | NM_002316    | 8           | 1                                      | 27                | 37    | 2.94E-01       | 3.07E-01      | 2.80E-01       | 3.70E-02       | 22279548  |
| NFKB1  | NM_003998    | 24          | 9                                      | 18                | 48    | 2.37E-02       | 2.09E-02      | 3.70E-02       | 4.79E-02       | 22279548  |
| PAPD5  | NM_001040285 | 13          | 4                                      | 37                | 55    | 3.73E-02       | 3.21E-02      | 5.40E-02       | 2.45E-02       | 22279548  |
| PARK2  | NM_004562    | 12          | 9                                      | 33                | 52    | 6.61E-02       | 3.67E-02      | 3.50E-01       | 6.87E-01       | 22279548  |
| PON1   | NM_000446    | 9           | 6                                      | 13                | 26    | 5.31E-01       | 4.16E-01      | 9.00E-03       | 4.34E-02       | 12082503  |
| PREX1  | NM_020820    | 40          | 8                                      | 12                | 19    | 7.18E-01       | 6.12E-01      | 1.01E-01       | 2.50E-02       | 22279548  |
| RAD51D | NR_037711    | 9           | 2                                      | 16                | 32    | 5.27E-02       | 9.41E-02      | 6.90E-02       | 4.10E-02       | 22279548  |
| SIRT3  | NM_012239    | 7           | 4                                      | 15                | 25    | 9.54E-01       | 8.21E-01      | 1.30E-01       | 4.22E-02       | 14580859  |
| SLC6A4 | NM_001045    | 15          | 5                                      | 17                | 30    | 1.11E-01       | 9.33E-03      | 3.70E-02       | 3.34E-02       | 16095668  |
| TOMM40 | NM_006114    | 10          | 1                                      | 6                 | 12    | 8.48E-01       | 7.72E-01      | 2.00E-02       | 9.42E-02       | 21418511  |
| WDR72  | NM_182758    | 20          | 9                                      | 42                | 61    | 1.80E-01       | 2.03E-01      | 3.50E-01       | 3.53E-02       | 20834067  |

References:

Wu, J., et al. (2005). "A summary of the effects of antihypertensive medications on measured blood pressure." *Am J Hypertens* **18**(7): 935-942.

Wu, J., et al. (2007). "An investigation of the effects of lipid-lowering medications: genome-wide linkage analysis of lipids in the HyperGEN study." *BMC Genet* **8**: 60.
